# Supplementary material for: Fabrication of shish-kebab structure of MnO2@Co3O4 with remarkably enhanced oxidase-mimicking activity for the detection of l-cysteine
Source: Royal Society of Chemistry journal article supplement (doi:10.1039/d3ce01017a), 2024-01-01
Supplement: d3ce01017a1.pdf [file d3ce01017a1.pdf]

Supporting information

**Fabrication of Shish-kebab Structure of  $\text{MnO}_2@\text{Co}_3\text{O}_4$  with Remarkable Enhanced Oxidase-mimicking Activity for Detection of L-cysteine**

Linyu Zhu, Jing Zheng\*, Yanan Ci, Lu Han, Jingjing Meng, Jiayi Qian, Xue-bo Yin\*

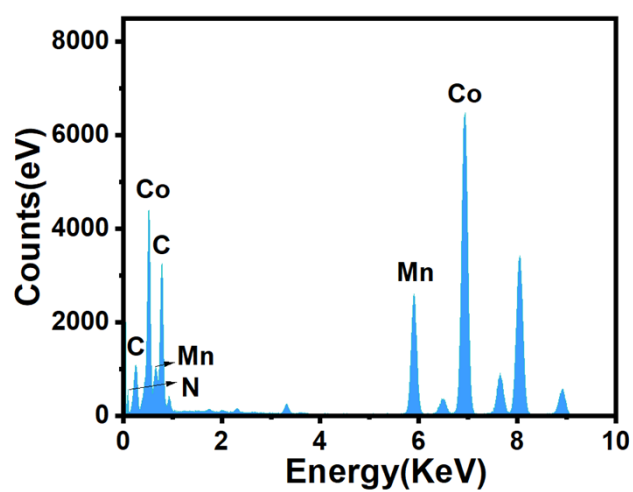

Figure. S1.EDX spectrum of  $\text{MnO}_2@\text{Co}_3\text{O}_4$

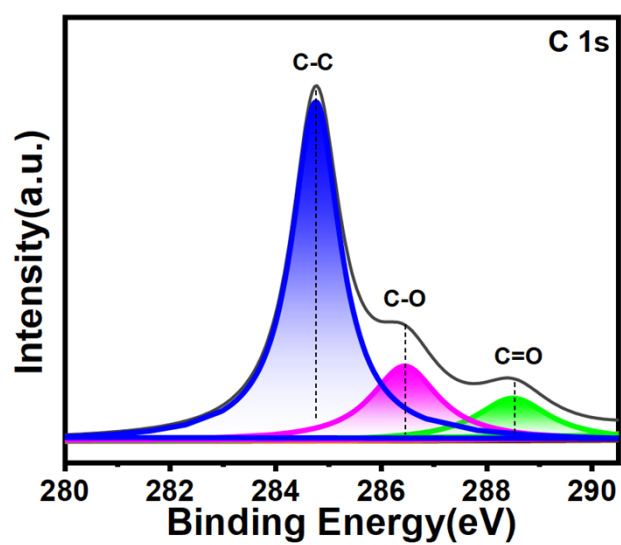

Figure. S2. C 1s spectra of the  $\text{MnO}_2@\text{Co}_3\text{O}_4$ .

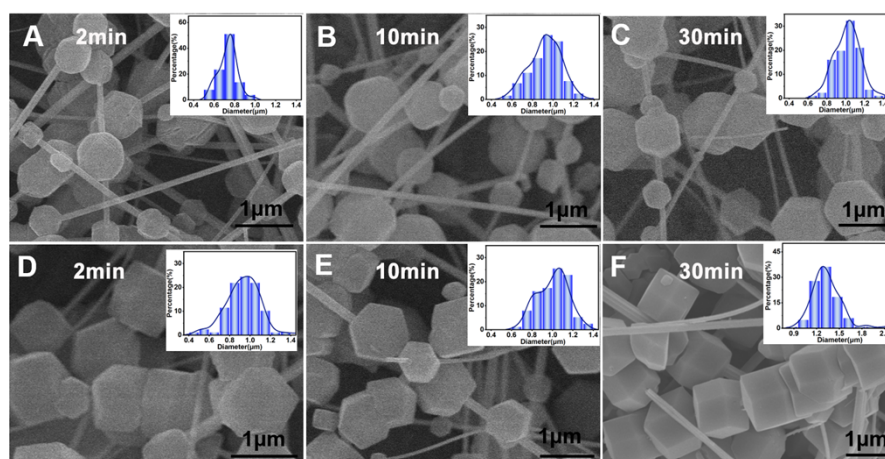

**Figure. S3.** SEM and Particle size distributions images of  $\text{MnO}_2@\text{ZIF-67}$ , the mixture was stirred for 2 minutes(A), 10 minutes(B), and 30 minutes(C) respectively, without overnight standing. SEM and Particle size distributions images of  $\text{MnO}_2@\text{ZIF-67}$ , the mixture was stirred for 2 minutes(D), 10 minutes(E), and 30 minutes(F) respectively, with overnight standing.

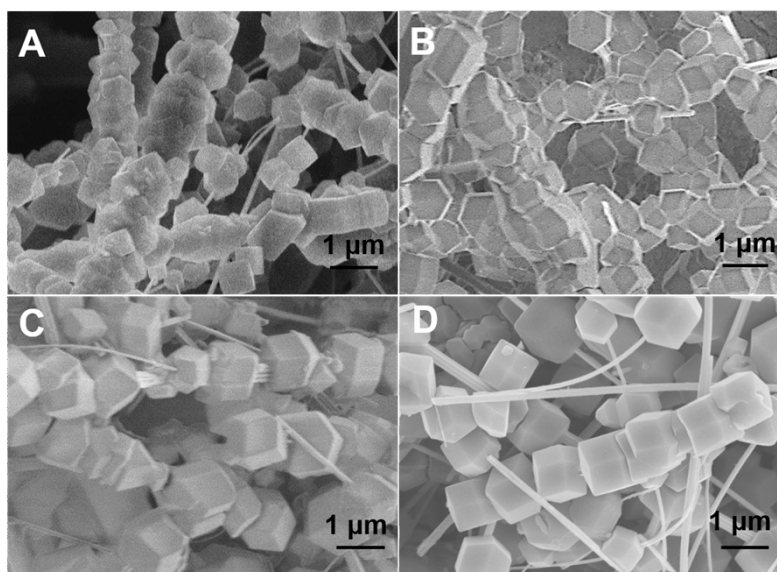

**Figure. S4.** The SEM images of  $\text{MnO}_2@\text{ZIF-67}$  without PVP(A), with the addition of 100mg PVP(B), 200mg PVP(C) and 300mg PVP(D).

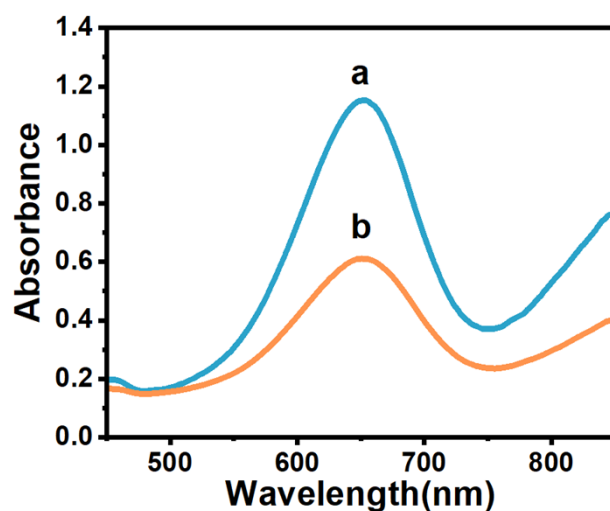

**Figure. S5.** The absorption spectra of the reaction in the air (a) and N<sub>2</sub>(b).

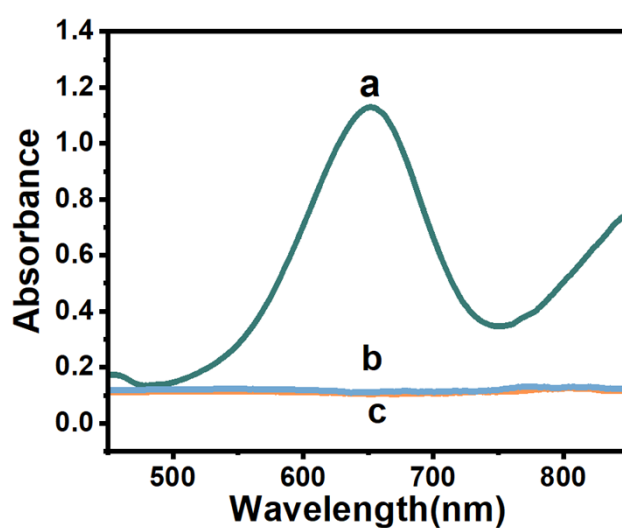

**Figure. S6.** (A) Typical UV-Vis spectra of different reaction systems: (a) MnO<sub>2</sub>@Co<sub>3</sub>O<sub>4</sub>+TMB+buffer, (b) MnO<sub>2</sub>@Co<sub>3</sub>O<sub>4</sub>+TMB+buffer+NaHSO<sub>3</sub> and (c) MnO<sub>2</sub>@Co<sub>3</sub>O<sub>4</sub>+TMB+buffer+Vitamin C. Experiments were performed by adding 2mg.mL<sup>-1</sup> of MnO<sub>2</sub>@Co<sub>3</sub>O<sub>4</sub> into pH 3.0 HAc-NaAc buffer solution containing 0.25mM TMB applied in the experiments as substrates at 50°C for 8 min.

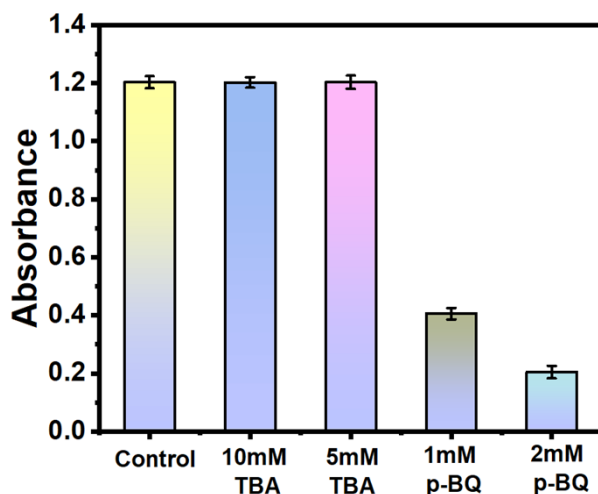

**Figure. S7.** The effect of free radical scavenger on the TMB-MnO<sub>2</sub>@Co<sub>3</sub>O<sub>4</sub> system. Experiments were performed by adding 2mg.mL<sup>-1</sup> of MnO<sub>2</sub>@Co<sub>3</sub>O<sub>4</sub> into pH 3.0 HAc-NaAc buffer solution containing 0.25mM TMB applied in the experiments as substrates at 25°C for 10min.

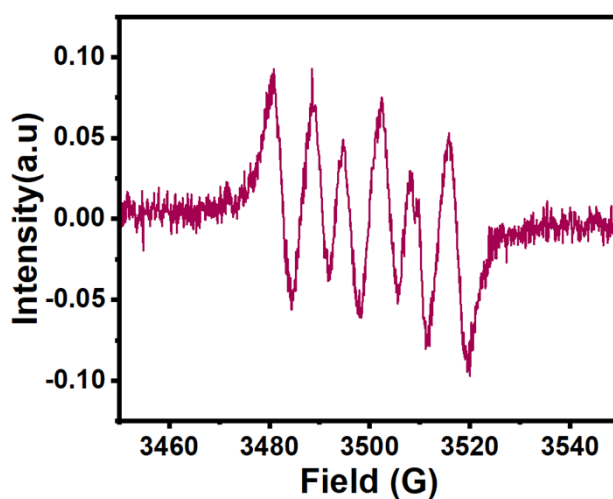

**Figure. S8.** EPR spectrum for detection of O<sub>2</sub><sup>-</sup> radicals. EPR determination was performed with 30 µl 5,5-dimethyl-1-pyrroline N-oxide (DMPO) and 30 µl of 1mg/ml MnO<sub>2</sub>@Co<sub>3</sub>O<sub>4</sub> in 100 ml deionized water/methanol as solvent. After the mixture is evenly mixed, a certain amount of the mixture is placed on a quartz tube and put into the EPR sample chamber for superoxide radical test.
